# Supplementary material for: Urbanisation generates multiple trait syndromes for terrestrial animal taxa worldwide
Source: PubMed Central journal article supplement (PMC10406945; doi:10.1038/s41467-023-39746-1), 2023-08-07
Supplement: 41467_2023_39746_MOESM1_ESM.pdf [file 41467_2023_39746_MOESM1_ESM.pdf]

1 Supplementary Information for

2 **Urbanisation generates multiple trait syndromes for terrestrial animal taxa**  
3 **worldwide**

4

5 † These authors contributed equally, \* Corresponding Authors: amy.hahs@unimelb.edu.au;

6 bertrand.fournier@uni-potsdam.de; johan.kotze@helsinki.fi; marco.moretti@wsl.ch

7

8 **Authors:** Amy K. Hahs<sup>†\*1</sup>, Bertrand Fournier<sup>†\*2</sup>, Myla F. J. Aronson<sup>3</sup>, Charles H. Nilon<sup>4</sup>,  
9 Adriana Herrera-Montes<sup>5</sup>, Allyson B. Salisbury<sup>6</sup>, Caragh G. Threlfall<sup>7,8</sup>, Christine C. Rega-  
10 Brodsky<sup>9</sup>, Christopher A. Lepczyk<sup>10</sup>, Frank A. La Sorte<sup>11</sup>, Ian MacGregor-Fors<sup>12</sup>, J. Scott  
11 MacIvor<sup>13</sup>, Kirsten Jung<sup>14</sup>, Max R. Piana<sup>15</sup>, Nicholas S.G. Williams<sup>1</sup>, Sonja Knapp<sup>16,17,18</sup>,  
12 Alan Vergnes<sup>19</sup>, Aldemar A. Acevedo<sup>20</sup>, Alison M. Gainsbury<sup>21</sup>, Ana Rainho<sup>22</sup>, Andrew J.  
13 Hamer<sup>23</sup>, Assaf Shwartz<sup>24</sup>, Christian C. Voigt<sup>25</sup>, Daniel Lewanzik<sup>25</sup>, David M. Lowenstein<sup>26</sup>,  
14 David O'Brien<sup>27</sup>, Desiree Tommasi<sup>28</sup>, Eduardo Pineda<sup>29</sup>, Ela Sita Carpenter<sup>30</sup>, Elena  
15 Belskaya<sup>31</sup>, Gábor L. Lövei<sup>32,33</sup>, James C. Makinson<sup>34</sup>, Joanna L. Coleman<sup>35</sup>, Jon P. Sadler<sup>36</sup>,  
16 Jordan Shroyer<sup>4</sup>, Julie Teresa Shapiro<sup>37</sup>, Katherine C. R. Baldock<sup>38,39,40</sup>, Kelly Ksiazek-  
17 Mikenas<sup>41</sup>, Kevin C. Matteson<sup>42</sup>, Kyle Barrett<sup>43</sup>, Lizette Siles<sup>44</sup>, Luis F. Aguirre<sup>45</sup>, Luis  
18 Orlando Armesto<sup>46</sup>, Marcin Zalewski<sup>47</sup>, Maria Isabel Herrera-Montes<sup>48</sup>, Martin K. Obrist<sup>49</sup>,  
19 Rebecca K. Tonietto<sup>50</sup>, Sara A. Gagné<sup>51</sup>, Sarah J. Hinnners<sup>52</sup>, Tanya Latty<sup>53</sup>, Thilina D.  
20 Surasinghe<sup>54</sup>, Thomas Sattler<sup>55</sup>, Tibor Magura<sup>56,33</sup>, Werner Ulrich<sup>57</sup>, Zoltan Elek<sup>58</sup>, Jennifer  
21 Castañeda-Oviedo<sup>59</sup>, Ricardo Torrado<sup>60</sup>, D. Johan Kotze<sup>†\*,12</sup>, Marco Moretti<sup>†\*,61</sup>

22

23

24 **Institutes:** <sup>1</sup>School of Agriculture, Food and Ecosystem Sciences, The University of  
25 Melbourne, Burnley Campus 500 Yarra Blvd, Richmond 3121 VIC Australia; <sup>2</sup>Institute of  
26 Environmental Science and Geography, University of Potsdam, Karl-Liebknecht-Str. 24-25,  
27 14476 Potsdam, Germany; <sup>3</sup>Department of Ecology, Evolution and Natural Resources,  
28 Rutgers, The State University of New Jersey, New Brunswick, NJ 08816 USA; <sup>4</sup>School of  
29 Natural Resources, University of Missouri, Columbia, MO 65211 USA; <sup>5</sup>Department of  
30 Environmental Science, College of Natural Sciences, University of Puerto Rico, San Juan,  
31 Puerto Rico; <sup>6</sup>The Morton Arboretum, 4100 Illinois Route 53, Lisle, IL 60532, USA; <sup>7</sup>School  
32 of Life and Environmental Sciences, The University of Sydney, Sydney, NSW 2006,  
33 Australia; <sup>8</sup>School of Natural Sciences, Macquarie University, Sydney, NSW 2109, Australia;  
34 <sup>9</sup>School of Science and Mathematics, Pittsburg State University, Pittsburg, KS 66762 USA;  
35 <sup>10</sup>School of Forestry, Wildlife and Environment, Auburn University, Auburn, AL 36849,  
36 USA; <sup>11</sup>Cornell Lab of Ornithology, Cornell University, Ithaca, NY, 14850 USA; <sup>12</sup>Faculty of  
37 Biological and Environmental Sciences, Ecosystems and Environment Research Programme,  
38 University of Helsinki, Niemenkatu 73, FI-15140, Lahti, Finland; <sup>13</sup>Department of Biological  
39 Sciences, University of Toronto Scarborough, 1265 Military Trail, Toronto, M1C 1A4,  
40 Canada; <sup>14</sup>Institute of Evolutionary Ecology and Conservation Genomics, Ulm University,  
41 Albert-Einstein-Allee 11, 89069 Ulm, Germany; <sup>15</sup>USDA Forest Service, Northern Research  
42 Station, Amherst, MA 01002 USA; <sup>16</sup>Helmholtz Centre for Environmental Research – UFZ,  
43 Department of Community Ecology, Theodor-Lieser-Str. 4, 06120 Halle (Saale), Germany;  
44 <sup>17</sup>German Centre for Integrative Biodiversity Research (iDiv) Halle-Jena-Leipzig, Puschstraße  
45 4, 04103 Leipzig, Germany; <sup>18</sup>Technische Universität Berlin, Department of Plant Ecology,  
46 Rothenburgstraße 12, 12165 Berlin, Germany; <sup>19</sup>CEFE, Univ Montpellier, CNRS, EPHE,  
47 IRD, Univ Paul Valéry Montpellier 3, Montpellier, France; <sup>20</sup>Departamento de Ciencias  
48 Ecológicas, Facultad de Ciencias, Laboratorio de Genética y Evolución, Universidad de Chile,

49 Las Palmeras 3425, Ñuñoa, Santiago, Chile; <sup>21</sup>University of South Florida, St. Petersburg  
50 Campus, Department of Integrative Biology, St. Petersburg, FL, 33701, USA; <sup>22</sup>cE3c – Centre  
51 for Ecology, Evolution and Environmental Changes at the Dept. of Animal Biology, Faculty  
52 of Sciences, Univ. of Lisbon, Lisboa, Portugal; <sup>23</sup>Institute of Aquatic Ecology, Centre for  
53 Ecological Research, Karolina u. 29, 1113 Budapest, Hungary; <sup>24</sup>Faculty of Architecture and  
54 Town Planning, Technion – Israel Institute of Technology, Haifa, 32000, Israel; <sup>25</sup>Dept. of  
55 Evolutionary Ecology, Leibniz Institute for Zoo and Wildlife Research, Alfred-Kowalke-Str.  
56 17, 10315 Berlin, Germany; <sup>26</sup>Michigan State University Extension, Macomb County, 21885  
57 Dunham Rd - Suite 12, Clinton Twp, MI 48036, USA; <sup>27</sup>Scottish Natural Heritage  
58 (NatureScot), Great Glen House, Inverness, IV3 8NW, UK; <sup>28</sup>Institute of Marine Sciences,  
59 University of California Santa Cruz, Santa Cruz, CA 95064, USA; <sup>29</sup>Red de Biología y  
60 Conservación de Vertebrados. Instituto de Ecología, A.C. Carretera Antigua a Coatepec 351,  
61 Xalapa, 91073, Mexico; <sup>30</sup>U.S. Fish and Wildlife Service, Chesapeake Bay Field Office, 177  
62 Admiral Cochrane Dr. Annapolis, MD 21401, USA; <sup>31</sup>Institute of Plant and Animal Ecology,  
63 Ural Branch, Russian Academy of Sciences, Eighth March Street 202, Yekaterinburg 620144,  
64 Russia; <sup>32</sup>Department of Agroecology, Aarhus University, Flakkebjerg Research Centre, DK-  
65 4200 Slagelse, Denmark; <sup>33</sup>ELKH-DE Anthropocene Ecology Research Group, University of  
66 Debrecen, H-4032 Debrecen, Egyetem square 1, Hungary; <sup>34</sup>Hawkesbury Institute for the  
67 Environment, Western Sydney University, Locked Bag 1797, Penrith, NSW, 2751, Australia;  
68 <sup>35</sup>Queens College at the City University of New York, Flushing NY USA; <sup>36</sup>School of  
69 Geography, Earth and Environmental Sciences, University of Birmingham, Edgbaston,  
70 Birmingham B15 2TT, UK; <sup>37</sup>University of Lyon, French Agency for Food, Environmental  
71 and Occupational Health & Safety (ANSES), Laboratory of Lyon, 31 Avenue Tony Garnier,  
72 69364, Lyon Cedex 07, France; <sup>38</sup>Department of Geography and Environmental Sciences,  
73 Northumbria University, Newcastle upon Tyne, UK; <sup>39</sup>School of Biological Sciences,

74 University of Bristol, Bristol, UK; <sup>40</sup>Cabot Institute, University of Bristol, Bristol, UK;  
75 <sup>41</sup>Department of Biology, Elmhurst University, Elmhurst, IL 60126 USA; <sup>42</sup>Department of  
76 Biology/Project Dragonfly, Miami University, Oxford, OH, USA; <sup>43</sup>Department of Forestry  
77 and Environmental Conservation, Clemson University, 261 Lehotsky Hall, Clemson, SC  
78 29631, USA; <sup>44</sup>Área de Mastozoología, Museo de Historia Natural Alcide d'Orbigny.  
79 Avenida Potosí 1458, Cochabamba. Cochabamba, Bolivia; <sup>45</sup>Centro de Biodiversidad y  
80 Genética, Universidad Mayor de San Simón, c Sucre, frente Parque La Torre s/n,  
81 Cochabamba, Bolivia; <sup>46</sup>Tecnoacademia, CEDRUM, Servicio Nacional de Aprendizaje  
82 (SENA), Cúcuta, Colombia; <sup>47</sup>Museum and Institute of Zoology of the Polish Academy of  
83 Sciences, Wilcza 64, Warsaw 00-679, Poland; <sup>48</sup>Grupo de Ecología Animal, Universidad del  
84 Valle, Cali, Colombia; <sup>49</sup>Swiss Federal Institute for Forest, Snow and Landscape Research  
85 WSL, Biodiversity and Conservation Biology, CH-8903 Birmensdorf, Switzerland;  
86 <sup>50</sup>Department of Natural Sciences, University of Michigan-Flint, 303 E Kearsley St., Flint,  
87 Michigan, 48502, USA; <sup>51</sup>University of North Carolina at Charlotte, 9201 University City  
88 Blvd., Charlotte, North Carolina, USA, 28223; <sup>52</sup>Department of City and Metropolitan  
89 Planning, University of Utah, Salt Lake City, Utah, USA; <sup>53</sup>Sydney Institute of Agriculture,  
90 School of Life and Environmental Sciences; University of Sydney, Sydney, Australia;  
91 <sup>54</sup>Department of Biological Sciences, Bridgewater State University, Bridgewater, MA 02325,  
92 USA; <sup>55</sup>Swiss Ornithological Institute, Seerose 1, CH-6204 Sempach, Switzerland;  
93 <sup>56</sup>Department of Ecology, Faculty of Science and Technology, University of Debrecen, H-  
94 4032 Debrecen, Egyetem square 1., Hungary; <sup>57</sup>Department of Ecology and Biogeography,  
95 Nicolaus Copernicus University, Lwowska 1, 87-100 Torun, Poland; <sup>58</sup>Centre for  
96 Agricultural Research, Plant Protection Institute, Eötvös Loránd Research Network, Herman  
97 Ottó út 15, Budapest 1022, Hungary; <sup>59</sup>Grupo de Investigación en Ecología y Biogeografía,  
98 Universidad de Pamplona, Pamplona, Colombia; <sup>60</sup>Secretaría de Educación del Municipio de

99 Cúcuta, Cúcuta, Colombia; <sup>61</sup>Swiss Federal Research Institute WSL, Biodiversity and  
100 Conservation Biology, Zürcherstrasse 111, 8903 Birmensdorf, Switzerland

101

102

## 103 **Table of Contents**

104 *Supplementary Fig. 1:* Global distribution of data included in this study

105 *Supplementary Fig. 2:* Additional information about functional diversity indices

106 *Supplementary Fig. 3:* Species accumulation curves for each taxonomic group

107 *Supplementary Fig. 4:* Correlations of diversity metrics across taxonomic groups

108 *Supplementary Fig. 5:* Correlations among environmental variables

109 *Supplementary Table 1:* Summary of the dataset used in the analyses

110 *Supplementary Table 2:* Summary of number of cities with different numbers of taxa sampled

111 *Supplementary Table 3:* Additional information about traits

112 *Supplementary Table 4:* Detailed description of **Amphibian** traits.

113 *Supplementary Table 5:* Detailed description of **Bat** traits.

114 *Supplementary Table 6:* Detailed description of **Bee** traits.

115 *Supplementary Table 7:* Detailed description of **Bird** traits.

116 *Supplementary Table 8:* Detailed description of **Carabid beetle** traits.

117 *Supplementary Table 9:* Detailed description of **Reptile** traits.

118 *Supplementary Table 10:* Factor loadings on global climate PCA axes

119 *Supplementary References*

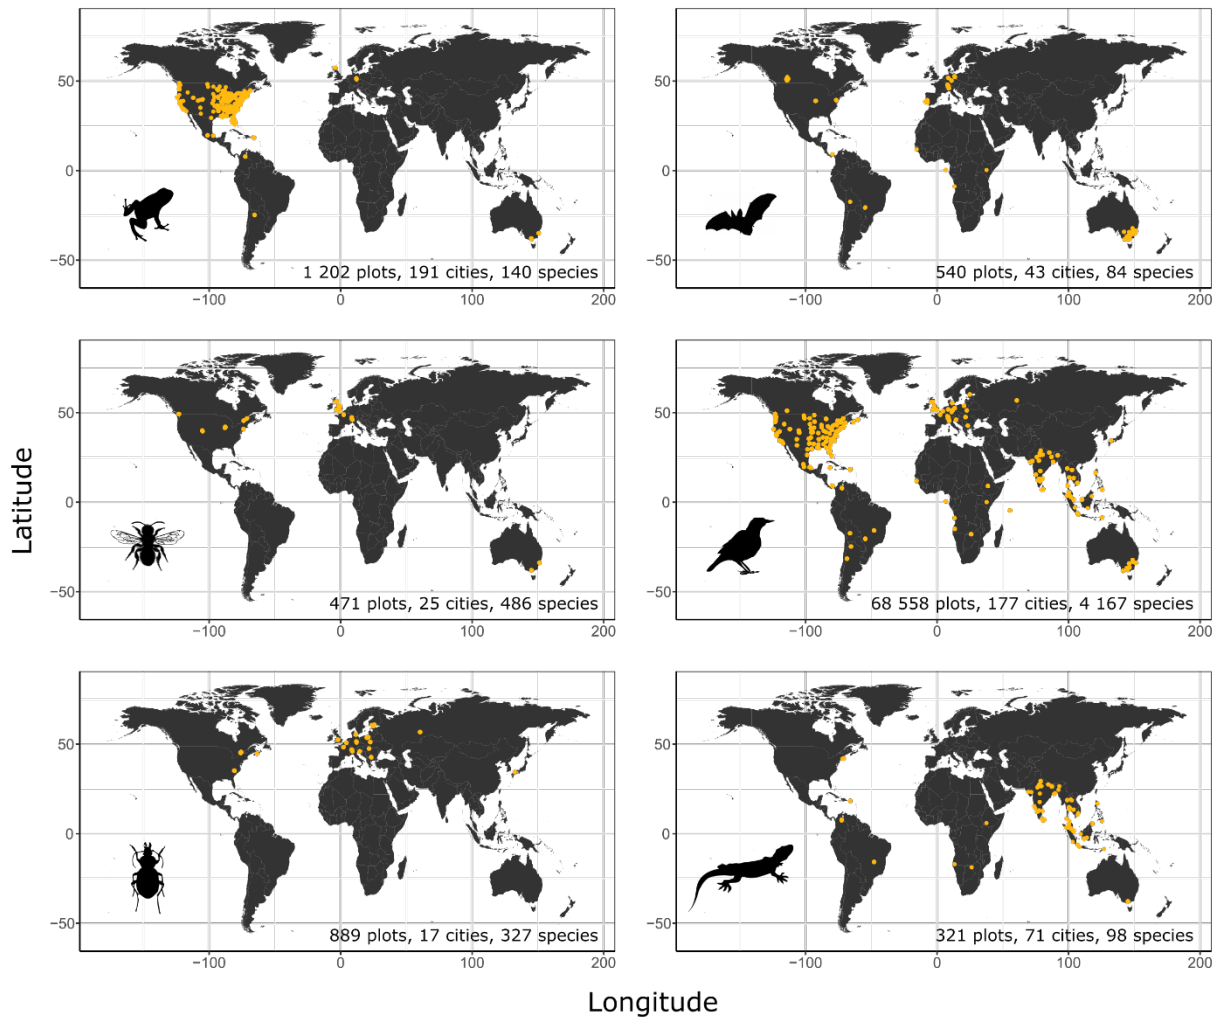

120

121 **Supplementary Fig. 1:** Global distribution of data included in this study. Locations of cities

122 (orange dots) with sampling plots for each taxonomic group individually. All data come from

123 the UrBioNet contributor network except for birds (eBird). Image credits: Ghedo and T.

124 Michael Keeseey (<https://creativecommons.org/licenses/by-sa/3.0/>) for the reptile. Michael

125 Keeseey (vectorization); Thorsten Assmann, Jörn Buse, Claudia Drees, Ariel-Leib-Leonid

126 Friedman, Tal Levanony, Andrea Matern, Anika Timm, and David W. Wrase (photography)

127 (<https://creativecommons.org/licenses/by/3.0/>) for the carabid beetle. All other silhouette

128 images come from [www.phylopic.org](http://www.phylopic.org) and are public domain images.

129

130

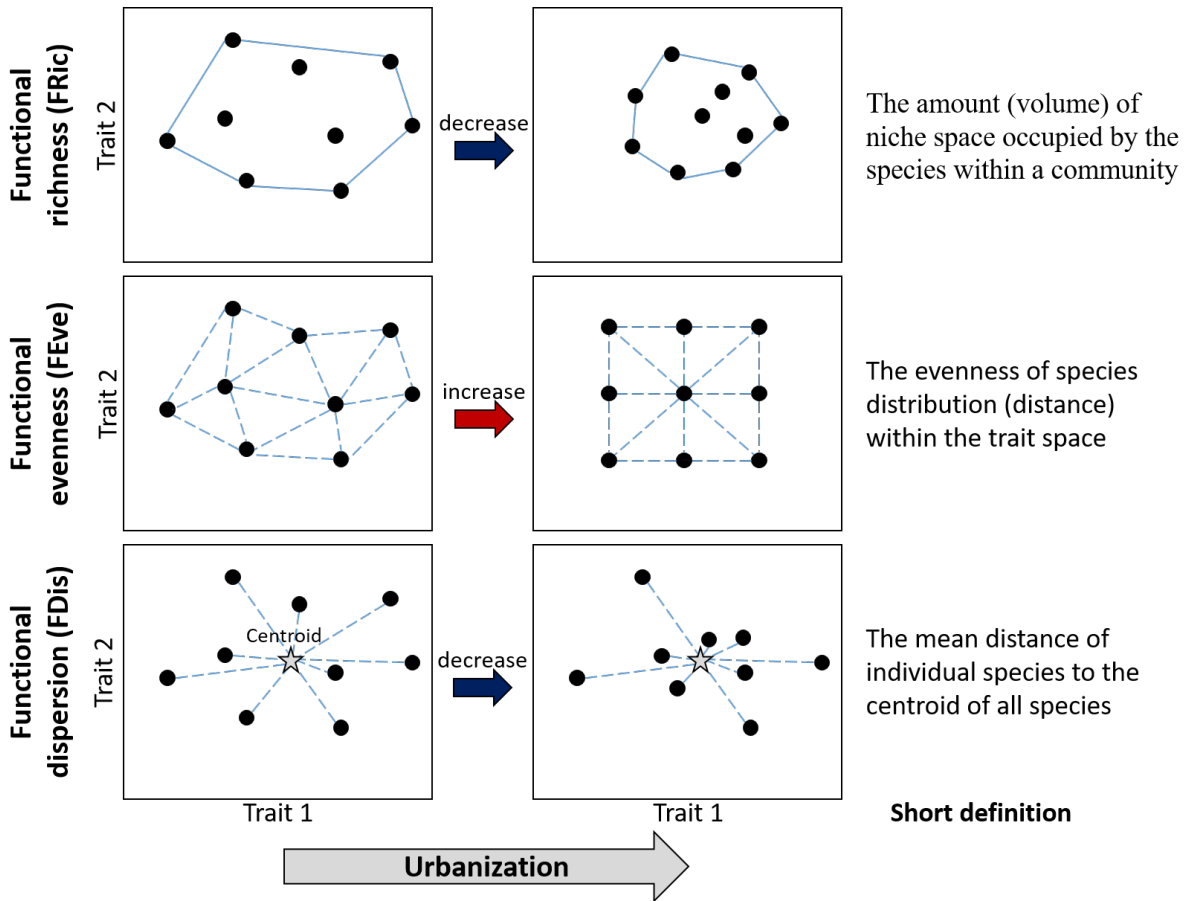

131

132 **Supplementary Fig. 2.** Additional information about functional diversity indices. Expected  
 133 responses of functional richness (FRic), functional evenness (FEve) and functional dispersion  
 134 (FDIs) to increased urbanisation. Functional richness is expected to decrease as a result of the  
 135 loss of some functional groups (environmental filtering). Functional evenness is expected to  
 136 increase as a result of increased competition for more scarce resources (competitive exclusion  
 137 of functionally similar species). Functional dispersion is expected to decrease because increased  
 138 urbanisation is expected to select for generalist species with broad environmental tolerances  
 139 (species close to the centroid). The right column provides a short definition of each index.

140

141

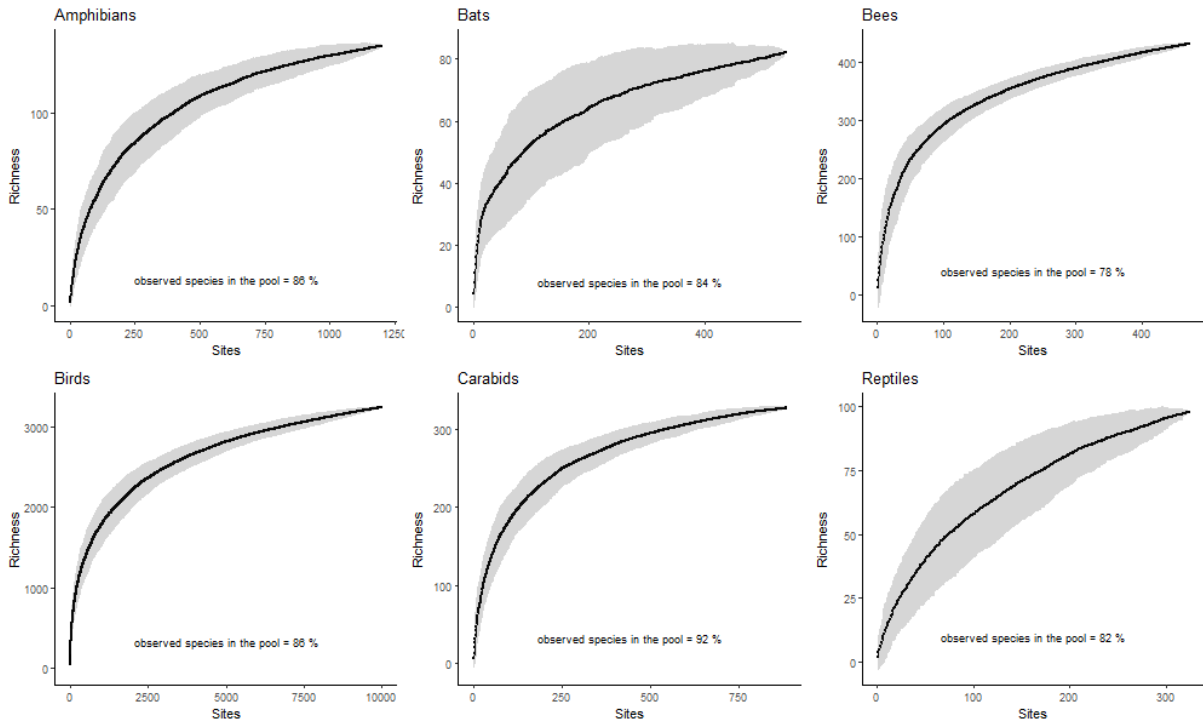

142  
 143 **Supplementary Fig. 3.** Species accumulation curves for each taxonomic group. These curves  
 144 were used to estimate the total number of species present in the global species pool  
 145 (extrapolated species richness in the species pool based on bootstrap resampling). Grey areas  
 146 represent the variability in species richness estimates ( $\pm 2$  standard deviation).

147



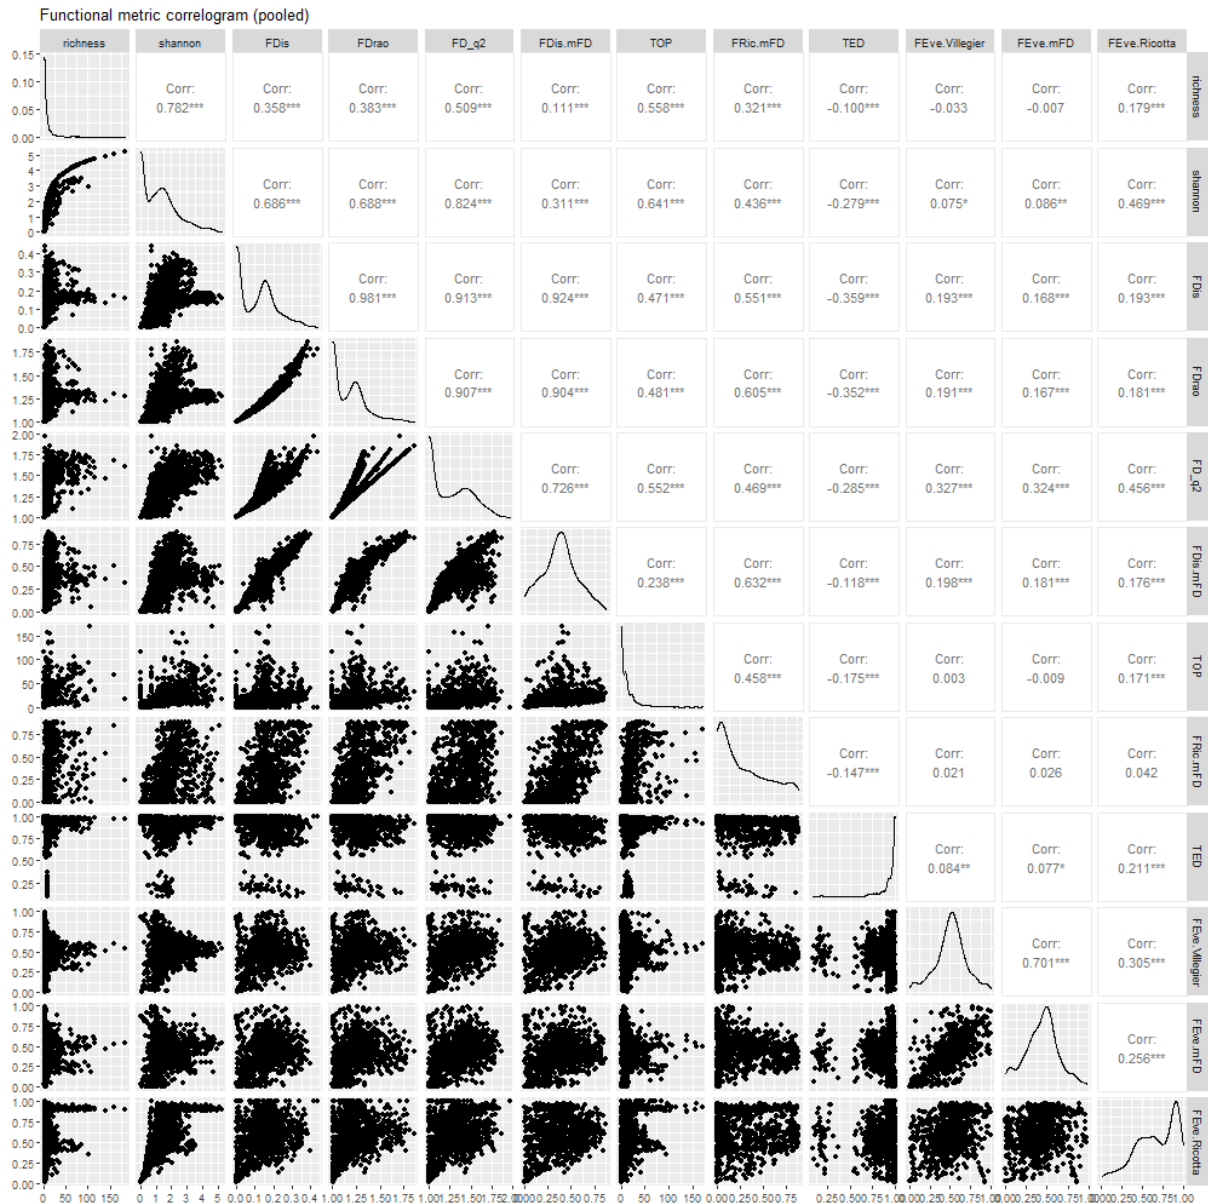

148

149 **Supplementary Fig. 4.** Correlations of diversity metrics across taxonomic groups. For each  
 150 taxonomic group, 300 sites were randomly chosen and pooled to ensure that each group  
 151 contributes equally to this analysis. For each functional diversity facet of interest, we selected  
 152 the metric showing the lowest correlations to species richness (functional dispersion =  
 153 FDis\_mFD, richness = FRic\_mFD, evenness = FEve\_mFD). Stars indicate significant  
 154 correlations (\* p < 0.05; \*\* p < 0.01; \*\*\* p < 0.001).

155

156

(A)

|                  | Urban (%) 100 | Urban (agg) 100 | Urban (%) 500 | Urban (agg) 500 | Forest (%) 100 | Forest (agg) 100 | Forest (%) 500 | Forest (agg) 500 | latitude    | Climate PC1 | Climate PC2 | Climate PC3 | Climate PC4 |
|------------------|---------------|-----------------|---------------|-----------------|----------------|------------------|----------------|------------------|-------------|-------------|-------------|-------------|-------------|
| Urban (%) 100    | <b>1.00</b>   | 0.18            | <b>0.90</b>   | 0.38            | -0.24          | -0.13            | -0.26          | -0.21            | -0.07       | -0.10       | -0.12       | -0.04       | -0.06       |
| Urban (agg) 100  | 0.18          | <b>1.00</b>     | 0.10          | 0.34            | -0.09          | -0.06            | -0.10          | -0.07            | -0.05       | -0.03       | -0.08       | -0.07       | 0.00        |
| Urban (%) 500    | <b>0.90</b>   | 0.10            | <b>1.00</b>   | 0.40            | -0.26          | -0.14            | -0.27          | -0.22            | -0.08       | -0.09       | -0.11       | -0.06       | -0.08       |
| Urban (agg) 500  | 0.38          | 0.34            | 0.40          | <b>1.00</b>     | -0.17          | -0.11            | -0.18          | -0.13            | -0.15       | -0.10       | -0.12       | -0.20       | 0.03        |
| Forest (%) 100   | -0.24         | -0.09           | -0.26         | -0.17           | <b>1.00</b>    | 0.50             | <b>0.88</b>    | <b>0.65</b>      | 0.20        | 0.11        | 0.07        | 0.12        | 0.01        |
| Forest (agg) 100 | -0.13         | -0.06           | -0.14         | -0.11           | 0.50           | <b>1.00</b>      | 0.42           | 0.45             | 0.13        | 0.11        | 0.08        | 0.06        | 0.01        |
| Forest (%) 500   | -0.26         | -0.10           | -0.27         | -0.18           | <b>0.88</b>    | 0.42             | <b>1.00</b>    | <b>0.72</b>      | 0.19        | 0.11        | 0.09        | 0.10        | 0.03        |
| Forest (agg) 500 | -0.21         | -0.07           | -0.22         | -0.13           | <b>0.65</b>    | 0.45             | <b>0.72</b>    | <b>1.00</b>      | 0.22        | 0.17        | 0.12        | 0.10        | 0.03        |
| latitude         | -0.07         | -0.05           | -0.08         | -0.15           | 0.20           | 0.13             | 0.19           | 0.22             | <b>1.00</b> | 0.45        | 0.18        | 0.44        | 0.14        |
| Climate PC1      | -0.10         | -0.03           | -0.09         | -0.10           | 0.11           | 0.11             | 0.11           | 0.17             | 0.45        | <b>1.00</b> | <b>0.79</b> | 0.16        | -0.06       |
| Climate PC2      | -0.12         | -0.08           | -0.11         | -0.12           | 0.07           | 0.08             | 0.09           | 0.12             | 0.18        | <b>0.79</b> | <b>1.00</b> | -0.19       | 0.26        |
| Climate PC3      | -0.04         | -0.07           | -0.06         | -0.20           | 0.12           | 0.06             | 0.10           | 0.10             | 0.44        | 0.16        | -0.19       | <b>1.00</b> | -0.23       |
| Climate PC4      | -0.06         | 0.00            | -0.08         | 0.03            | 0.01           | 0.01             | 0.03           | 0.03             | 0.14        | -0.06       | 0.26        | -0.23       | <b>1.00</b> |

(B)

|                   | Urban (%) 1000 | Urban (agg) 1000 | Forest (%) 1000 | Forest (agg) 1000 | latitude    | Climate PC1 | Climate PC2 | Climate PC3 | Climate PC4 |
|-------------------|----------------|------------------|-----------------|-------------------|-------------|-------------|-------------|-------------|-------------|
| Urban (%) 1000    | <b>1.00</b>    | <b>0.80</b>      | -0.42           | -0.25             | -0.12       | -0.10       | -0.10       | -0.04       | 0.00        |
| Urban (agg) 1000  | <b>0.80</b>    | <b>1.00</b>      | -0.34           | -0.15             | -0.08       | -0.09       | -0.14       | -0.05       | -0.01       |
| Forest (%) 1000   | -0.42          | -0.34            | <b>1.00</b>     | <b>0.51</b>       | 0.10        | -0.13       | -0.29       | 0.18        | -0.13       |
| Forest (agg) 1000 | -0.25          | -0.15            | <b>0.51</b>     | <b>1.00</b>       | 0.09        | -0.01       | -0.10       | 0.04        | -0.04       |
| latitude          | -0.12          | -0.08            | 0.10            | 0.09              | <b>1.00</b> | 0.44        | 0.08        | 0.31        | -0.08       |
| Climate PC1       | -0.10          | -0.09            | -0.13           | -0.01             | 0.44        | <b>1.00</b> | <b>0.66</b> | 0.22        | -0.19       |
| Climate PC2       | -0.10          | -0.14            | -0.29           | -0.10             | 0.08        | <b>0.66</b> | <b>1.00</b> | -0.34       | 0.23        |
| Climate PC3       | -0.04          | -0.05            | 0.18            | 0.04              | 0.31        | 0.22        | -0.34       | <b>1.00</b> | -0.40       |
| Climate PC4       | 0.00           | -0.01            | -0.13           | -0.04             | -0.08       | -0.19       | 0.23        | -0.40       | <b>1.00</b> |



157

158 **Supplementary Fig. 5:** Correlations among environmental variables. A = all taxa except  
 159 birds; B = birds. Correlations between predictors are relatively low between urban land cover,  
 160 forest land cover, latitude, and climate while being relatively high between percent cover and  
 161 aggregation, as well as among different scales. Blue = positive correlations; Red = negative  
 162 correlations. Bolded values indicate significant correlations ( $p < 0.05$ ).

163

164

165 **Supplementary Table 1:** Summary of the dataset used in the analyses and whether the data  
 166 were compiled from directly contributed datasets, or e-Bird. The geographical distribution of  
 167 the sampling plots for each taxonomic group is shown in Fig. 1 and Supplementary Fig. 1.

| <i>Taxa</i> | <i>N. Plots</i> | <i>N. Cities</i> | <i>N. Species</i> | <i>Source</i>                |
|-------------|-----------------|------------------|-------------------|------------------------------|
| Amphibians  | 1 202           | 191              | 140               | UrBioNet contributor network |
| Bats        | 540             | 43               | 84                | UrBioNet contributor network |
| Bees        | 471             | 25               | 486               | UrBioNet contributor network |
| Birds       | 68 558          | 177              | 4 167             | e-Bird                       |
| Carabids    | 882             | 17               | 327               | UrBioNet contributor network |
| Reptiles    | 324             | 71               | 98                | UrBioNet contributor network |

168

169 **Supplementary Table 2:** Summary of number of cities with different numbers of taxa sampled.  
 170 For example, only one city has been sampled for 5 taxa (Melbourne, Australia), and 3 cities  
 171 have been sampled for 4 taxa (Lugano, Luzern and Zürich, Switzerland). The geographical  
 172 distribution of the sampling plots for each taxonomic group is shown in Fig. 1 and  
 173 Supplementary Fig. 1.

| Number Taxa Sampled in the City | Number of Cities |
|---------------------------------|------------------|
| 1                               | 254              |
| 2                               | 109              |
| 3                               | 12               |
| 4                               | 3                |
| 5                               | 1                |

175 **Supplementary Table 3:** Information about the evaluated traits presented in Fig. 2 of the  
 176 manuscript. Specific traits are presented here but have not been shown in Fig. 2 of the  
 177 manuscript. Further information around these traits and the data sources used for each  
 178 individual taxonomic group can be found in Supplementary Tables 4-9.

| <i>Taxonomic group</i> | <i>Body size</i>                     | <i>Feeding</i>                                             | <i>Mobility</i>                                                    | <i>Reproductive Strategy</i>                                     | <i>Specific traits</i>                                                                                                                                        |
|------------------------|--------------------------------------|------------------------------------------------------------|--------------------------------------------------------------------|------------------------------------------------------------------|---------------------------------------------------------------------------------------------------------------------------------------------------------------|
| Amphibians             | <b>Body length</b><br>[cm]           | <b>Diet breadth</b><br>(specialist=0;<br>generalist=1)     | <b>Movement Distances</b><br>(reduced=0;<br>moderate=1;<br>high=2) | <b>Clutch size</b><br>(0=small; 1 =<br>intermediate;<br>2=large) | Aquatic habitat<br>affinity index<br>(0=low;1=medium;<br>2=high)                                                                                              |
| Bats                   | <b>Forearm length</b><br>[mm]        | <b>Hunting strategy</b><br>(gleaning=1;<br>others=0)       | <b>Aspect ratio</b>                                                | <b>Roosting requirements</b><br>(specialist=0;<br>generalist=1)  | Wing loading (nb) /<br>Echolocation (kHz) /<br>Dispersal strategy<br>(mobility in open<br>habitats=1; others=0)                                               |
| Bees                   | <b>Inter-tegula distance</b><br>[mm] | <b>Tongue length</b><br>(short tongue=1; long<br>tongue=0) | <b>Inter-tegula distance</b> [mm]                                  | <b>Sociality</b> (Solitary<br>=1; other=0)                       | Nesting strategy<br>(Below ground<br>(Below ground =1;<br>others=0) / Above<br>ground (Above<br>ground =1; others=0) /<br>Parasite (Parasite=1;<br>others=0)) |

|          |                            |                                                                                                                                                                                          |                                                                                |                                                                  |                                                                                                                                      |
|----------|----------------------------|------------------------------------------------------------------------------------------------------------------------------------------------------------------------------------------|--------------------------------------------------------------------------------|------------------------------------------------------------------|--------------------------------------------------------------------------------------------------------------------------------------|
| Birds    | <b>Body mass</b><br>[g]    | Trophic niche<br>(omnivorous=1;<br>others=0 / Fruit-<br>nectar=1; others=0 /<br>Invertebrate=1;<br>others=0 / Plant-<br>seed=1; others=0 /<br>Vertebrates-<br>scavenger =1;<br>others=0) | <b>Hand-wing index</b>                                                         | <b>Clutch size</b><br>(number of eggs)                           | Foraging strata index<br>(Habitat [0=aquatic;<br>1=terrestrial;<br>2=aerial]; Aquatic [0-<br>2]; Terrestrial [0-4],<br>Aerial [0-1]) |
| Carabids | <b>Body length</b><br>[cm] | Trophic guild<br>(Herbivore=1;<br>others=0, Carnivore=<br>1; others=0,<br>Omnivore=1;<br>others=0)                                                                                       | <b>Wing morphology</b><br>(0=brachypterous;<br>1=dimorphic;<br>2=macropterous) | <b>Overwintering strategy</b> (imago hibernator=1; others=0)     | Abiotic tolerance<br>(0=hygro-; 1=meso-;<br>2=xerophilous)                                                                           |
| Reptiles | <b>Body length</b><br>[cm] | <b>Diet breadth</b><br>(specialist=0,<br>generalist=1)                                                                                                                                   | <b>Movement distances</b><br>(reduced=0;<br>moderate=1;<br>high=2)             | <b>Clutch size</b><br>(0=small; 1 =<br>intermediate;<br>2=large) | Aquatic habitat<br>affinity index<br>(0=low;1=medium;<br>2=high)                                                                     |

179

180

181 **Supplementary Table 4:** Detailed description of **Amphibian** traits.

| <i>Trait</i>          | <i>Description and unit</i>                                                                                                                                                                                                                                                                                        | <i>Trait type</i>         | <i>Sources</i>                                                                                            |
|-----------------------|--------------------------------------------------------------------------------------------------------------------------------------------------------------------------------------------------------------------------------------------------------------------------------------------------------------------|---------------------------|-----------------------------------------------------------------------------------------------------------|
| Body size             | <b>Mean body length</b> (in cm) from the tip of the snout to the most posterior opening of the cloacal slit, snout-vent length (SVL). In the case of salamanders, total length measurements include body and tail.                                                                                                 | Continuous                | Baker et al. 2011 <sup>1</sup><br><br>Beebee & Griffiths 2000 <sup>2</sup><br><br>Frost 2021 <sup>3</sup> |
| Mobility              | <b>Mobility.</b> Three categories: reduced ( $\leq 100$ m), moderate (101 – 1000 m), and high ( $> 1000$ m) levels of mobility in relation to regional pools.                                                                                                                                                      | Semi-continuous (0, 1, 2) | Lips et al. 2003 <sup>4</sup>                                                                             |
| Reproductive strategy | <b>Clutch size.</b> Three categories: small clutches ( $\leq 20$ eggs), medium (21 – 300 eggs), and large ( $> 300$ eggs).                                                                                                                                                                                         | Semi-continuous (0, 1, 2) | Stevens et al. 2014 <sup>5</sup><br><br>Trochet et al. 2014 <sup>6</sup>                                  |
| Feeding               | <b>Diet.</b> Two categories: specialists (those who ingest 1-2 food types), and generalists (consuming 3 or more food types). When this information is not available, use mouth size as a proxy of feeding traits, with larger mouths representing generalist species and smaller mouths representing specialists. | Semi-continuous (0, 1)    | amphibiaweb.org<br><br>animaldiversity.org<br><br>iucnredlist.org<br><br>research.amnh.org                |
| Taxon specific        | <b>Aquatic index.</b> Three categories: exclusively terrestrial, occupying ponds or multiple habitats, or exclusively riparian.                                                                                                                                                                                    | Semi-continuous (0, 1, 2) | Expert knowledge for single species scarcely documented.                                                  |

182

183

| <i>Trait</i>          | <i>Description and unit</i>                                                                                                                                                                                                                                                                                                                                                                                                                                                                                             | <i>Trait type</i>                                     | <i>Sources</i>                                           |
|-----------------------|-------------------------------------------------------------------------------------------------------------------------------------------------------------------------------------------------------------------------------------------------------------------------------------------------------------------------------------------------------------------------------------------------------------------------------------------------------------------------------------------------------------------------|-------------------------------------------------------|----------------------------------------------------------|
| Body size             | <b>Forearm length</b> (in mm)                                                                                                                                                                                                                                                                                                                                                                                                                                                                                           | Continuous                                            | Denzinger & Schnitzler 2013 <sup>7</sup>                 |
| Mobility              | Aspect ratio: the <b>ratio of wing span to wing area</b> . Higher aspect ratio enables fast, but less manoeuvrable flight.                                                                                                                                                                                                                                                                                                                                                                                              | Continuous                                            | Jung & Threlfall 2018 <sup>8</sup>                       |
| Reproductive strategy | Bats were grouped into species specialized on certain <b>roosting requirements</b> (e.g., caves, foliage) or those that are flexible in their choice of roosting sites.                                                                                                                                                                                                                                                                                                                                                 | Categorical                                           | Expert knowledge for single species scarcely documented. |
| Feeding               | Species were classified as those catching aerial insects in flight ( <b>aerial hunters</b> ) <b>and others</b> , which include gleaning prey from surfaces or the vegetation (gleaning), or perch hunting (the latter two categories were not abundant enough to keep separate and hence were merged for analysis).                                                                                                                                                                                                     | Categorical                                           |                                                          |
| Taxon specific        | <b>Wing loading:</b> wing area per body mass<br><br><b>Echolocation</b> (kHz): frequency of maximum amplitude or characteristic frequency (in the case of zero-cross-based recordings, i.e. Anabat recording systems) of echolocation calls.<br><br><b>Habitat preference</b> classified as <b>foraging</b> in open habitats, or edge or cluttered habitats. The latter two were grouped due to insufficient numbers of species. The two categories were: foraging in open space=1; and others=0 (clutter, edge space). | Continuous<br><br>Continuous<br><br>Categorical (0,1) |                                                          |

185

186

187

| <i>Trait</i>          | <i>Description and unit</i>                                                                                                                                                                                                                                                                                                                                                                                                | <i>Trait type</i> | <i>Sources</i>                                                                                                                                       |
|-----------------------|----------------------------------------------------------------------------------------------------------------------------------------------------------------------------------------------------------------------------------------------------------------------------------------------------------------------------------------------------------------------------------------------------------------------------|-------------------|------------------------------------------------------------------------------------------------------------------------------------------------------|
| Body size             | Body size was given using the <b>inter-tegula distance</b> , ITD (in mm), given the two measures are highly correlated. ITD is the space between the two tegulae, which are the insertion points for each forewing. ITD measurements were obtained from the authors of each study, and are usually measured using an ocular micrometer or handheld calipers.                                                               | Continuous        | Hinners et al. 2012 <sup>9</sup><br>Normandin et al. 2017 <sup>10</sup><br>Threlfall et al. 2015 <sup>11</sup><br>Cariveau et al. 2016 <sup>12</sup> |
| Mobility              | <b>Inter-tegula distance</b> , ITD (mm) as above.                                                                                                                                                                                                                                                                                                                                                                          | Continuous        | Expert knowledge for single species scarcely documented.                                                                                             |
| Reproductive strategy | <b>Sociality</b> was used as a proxy for reproductive strategy since it integrates several reproduction features (e.g., number of brood cells, gender organisation etc.). We classified sociality as 'solitary' and 'other', where the latter included eusocial, primitively-social or semi-social.                                                                                                                        | Categorical       |                                                                                                                                                      |
| Feeding               | <b>Tongue length</b> , categorised as short or long mouthparts. If species data were missing, tongue length was estimated using bee family and inter-tegula distance as per Cariveau et al. (2016) <sup>12</sup> , and subsequently assigned as short or long.                                                                                                                                                             | Categorical       |                                                                                                                                                      |
| Taxon specific        | Bees use a diversity of nesting locations or substrates, some of which can be heavily impacted upon by features of the urban environment. To simplify across the various <b>nesting strategies</b> that have been documented (Michener 2000 <sup>13</sup> ) we classified species to the following:<br><br>Below ground (Below ground=1; others=0) Above ground (Above ground=1; others=0) Parasite (Parasite=1; others=0) | Categorical       |                                                                                                                                                      |



191 **Supplementary Table 7:** Detailed description of **Bird** traits.

| <i>Trait</i>          | <i>Description and unit</i>                                                                                                                                                                                                                                                                                                                                                                                                                                                                                                                                 | <i>Trait type</i>               | <i>Sources</i>                                                     |
|-----------------------|-------------------------------------------------------------------------------------------------------------------------------------------------------------------------------------------------------------------------------------------------------------------------------------------------------------------------------------------------------------------------------------------------------------------------------------------------------------------------------------------------------------------------------------------------------------|---------------------------------|--------------------------------------------------------------------|
| Body size             | Geometric mean of <b>body mass</b> average values for both sexes [in g].                                                                                                                                                                                                                                                                                                                                                                                                                                                                                    | Continuous                      | Jetz et al. 2008 <sup>14</sup><br>Sheard et al. 2020 <sup>15</sup> |
| Mobility              | <b>Hand-wing index</b> , ratio of the difference between wing length (from carpal joint to tip of longest primary feather) and secondary length (from carpal joint to tip of 1 <sup>st</sup> secondary feather) by wing length [(wl-sl)/wl].                                                                                                                                                                                                                                                                                                                | Continuous                      | Wilman et al. 2014 <sup>16</sup>                                   |
| Reproductive strategy | <b>Clutch size</b> [average number of laid eggs per nest].                                                                                                                                                                                                                                                                                                                                                                                                                                                                                                  | Continuous                      |                                                                    |
| Feeding               | Categorical <b>diet</b> assigned based on the dominant among five diet categories, based in the summed scores of individual diets [fruit-nectar (e.g., fruits, drupes, nectar, pollen, plant exudates, gums), invertebrates (e.g., shrimp, krill, crustaceans, molluscs, cephalopods, gastropods, insects, worms, etc.), plant-seed (e.g., seeds, nuts, grains, and other plant materials not included in fruit-nectar), vertebrates-scavenger (e.g., vertebrates, carrion, garbage, etc.), omnivorous (score of ≤ 50 of all specific categories)].         | Categorical                     |                                                                    |
| Taxon specific        | <b>Foraging strata index. Habitat</b> [0=aquatic; 1=terrestrial; 2=aerial] = (below surface + around surface) + 2*(ground + understory + mid high + canopy) + 3*(aerial);<br><br><i>Aquatic</i> : [0 = does not forage in aquatic systems, 1 = forage on or just below water surface (<12.7cm), 2 = forage below water surfaces] = below surface + 2*around surface;<br><br><i>Terrestrial</i> [0=does not feed in terrestrial systems, 1=feed on the ground, 2=feeds on the understory below 2 m, 3=feeds between 2 m and tree canopy, 4=feeds in the tree | Semi-continuous and categorical |                                                                    |

|  |                                                                                                                                                                                             |  |  |
|--|---------------------------------------------------------------------------------------------------------------------------------------------------------------------------------------------|--|--|
|  | canopy] = ground + 2* understory + 3 * mid high + 4<br>*canopy.<br><i>Aerial</i> [0=does not feed well above vegetation or any structures, 1=feed well above vegetation or any structures]. |  |  |
|--|---------------------------------------------------------------------------------------------------------------------------------------------------------------------------------------------|--|--|

192

193

194 **Supplementary Table 8:** Detailed description of **Carabid beetle** traits.

| <i>Trait</i>                         | <i>Description and unit</i>                                                                                                                                                                                                                                                                                                                                                                         | <i>Trait type</i>         | <i>Sources</i>                                                                        |
|--------------------------------------|-----------------------------------------------------------------------------------------------------------------------------------------------------------------------------------------------------------------------------------------------------------------------------------------------------------------------------------------------------------------------------------------------------|---------------------------|---------------------------------------------------------------------------------------|
| Body size                            | Mean <b>body length</b> from the tip of the head to the tip of the abdomen (in mm)                                                                                                                                                                                                                                                                                                                  | continuous                | Klaiber et al. 2017 <sup>17</sup><br>Lindroth 1985 <sup>18</sup> , 1986 <sup>19</sup> |
| Feeding                              | Trophic guild. Three categories: <i>herbivore</i> , <i>carnivore</i> , <i>omnivore</i> .                                                                                                                                                                                                                                                                                                            | Categorical (0=no, 1=yes) | carabids.org                                                                          |
| Mobility                             | <b>Hind wing development.</b> Three categories: <i>brachypterous</i> (short-winged or wingless), <i>dimorphic</i> (short and long-winged individuals present in the same species), <i>macropterous</i> (long-winged).                                                                                                                                                                               | Semi-continuous (0, 1, 2) |                                                                                       |
| Reproductive strategy                | <b>Overwintering strategy.</b> Two categories: <i>spring breeder</i> (imago/adult hibernators, these species reproduce in the spring to early summer, their larvae develop in the summer and a new adult generation appears in the autumn, with these adults overwintering); <i>autumn breeder</i> (larval hibernators – these species reproduce in the summer or autumn and overwinter as larvae). | categorical (y/n)         |                                                                                       |
| Taxon specific:<br>Drought tolerance | <b>Tolerance to drought conditions.</b> Three categories: <i>hygrophilic</i> (wetness preference), <i>mesophilic</i> (intermediate preference) and <i>xerophilic</i> (drought preference).                                                                                                                                                                                                          | Semi-continuous (0, 1, 2) |                                                                                       |

195

196

197 **Supplementary Table 9:** Detailed description of **Reptile** traits.

| <i>Trait</i>          | <i>Description and unit</i>                                                                                                                                                                                                                                                                                        | <i>Trait type</i>         | <i>Sources</i>                                              |
|-----------------------|--------------------------------------------------------------------------------------------------------------------------------------------------------------------------------------------------------------------------------------------------------------------------------------------------------------------|---------------------------|-------------------------------------------------------------|
| Body size             | Total <b>body length</b> for lizards, snakes, and crocodiles.<br><b>Carapace length</b> for turtles (in cm).                                                                                                                                                                                                       | continuous                | Stevens et al. 2014 <sup>5</sup><br>reptile-database.org    |
| Mobility              | <b>Mobility.</b> Three categories: 0=reduced ( $\leq 100$ m), 1=moderate (101 - 1000 m), and 2=high ( $> 1000$ m) levels of mobility in relation to their year-round activities.                                                                                                                                   | Semi-continuous (0, 1, 2) | animaldiversity.org<br>iucnredlist.org<br>research.amnh.org |
| Reproductive strategy | <b>Clutch size.</b> Three categories: 0=small clutches ( $\leq 20$ eggs), 1=medium (21 – 100 eggs), and 2=large ( $> 100$ eggs).                                                                                                                                                                                   | Semi-continuous (0, 1, 2) | Expert knowledge for single species scarcely documented.    |
| Feeding               | <b>Diet.</b> Two categories: specialists (those who ingest 1-2 food types), and generalists (consuming 3 or more food types). When this information is not available, use mouth size as a proxy of feeding traits, with larger mouths representing generalist species and smaller mouths representing specialists. | Semi-continuous (0, 1)    |                                                             |
| Taxon specific:       | <b>Aquatic index.</b> Three categories: 0=exclusively terrestrial, 1=occupying ponds or multiple habitats, or 3=exclusively riparian.                                                                                                                                                                              | Semi-continuous (0, 1, 2) |                                                             |

198

199

200

201 **Supplementary Table 10:** Factor loadings on global climate PCA axes. Only the first four axes  
 202 that were retained for further analyses are shown. PC1 = cold-warm temperature; PC2 = broad  
 203 (e.g. deserts) – narrow diurnal range (e.g. tropics); PC3 = high-low variability of temperatures;  
 204 PC4 = high-low seasonality of precipitation.

|                                             | PC1 (55%)     | PC2 (19%)     | PC3 (9%)     | PC4 (6%)     |
|---------------------------------------------|---------------|---------------|--------------|--------------|
| clim01: Annual Mean Temperature             | <b>-0.284</b> | 0.197         | 0.049        | -0.063       |
| clim02: Mean Diurnal Range                  | -0.137        | <b>0.401</b>  | 0.084        | 0.009        |
| clim03: Isothermality                       | -0.270        | 0.032         | -0.264       | -0.007       |
| clim04: Temperature Seasonality             | 0.223         | 0.096         | <b>0.479</b> | 0.125        |
| clim05: Max Temperature of Warmest Month    | -0.253        | 0.267         | 0.185        | -0.031       |
| clim06: Min Temperature of Coldest Month    | <b>-0.296</b> | 0.121         | -0.089       | -0.094       |
| clim07: Temperature Annual Range            | 0.174         | 0.216         | <b>0.512</b> | 0.141        |
| clim08: Mean Temperature of Wettest Quarter | -0.248        | 0.223         | 0.235        | 0.055        |
| clim09: Mean Temperature of Driest Quarter  | -0.271        | 0.150         | -0.140       | -0.152       |
| clim10: Mean Temperature of Warmest Quarter | -0.259        | 0.249         | 0.180        | -0.037       |
| clim11: Mean Temperature of Coldest Quarter | <b>-0.294</b> | 0.141         | -0.084       | -0.082       |
| clim12: Annual Precipitation                | -0.249        | -0.281        | 0.092        | 0.151        |
| clim13: Precipitation of Wettest Month      | -0.245        | -0.193        | 0.014        | <b>0.370</b> |
| clim14: Precipitation of Driest Month       | -0.163        | <b>-0.325</b> | 0.269        | -0.239       |
| clim15: Precipitation Seasonality           | 0.030         | 0.150         | -0.200       | <b>0.677</b> |
| clim16: Precipitation of Wettest Quarter    | -0.246        | -0.198        | 0.016        | <b>0.362</b> |
| clim17: Precipitation of Driest Quarter     | -0.166        | <b>-0.327</b> | 0.265        | -0.234       |
| clim18: Precipitation of Warmest Quarter    | -0.192        | -0.205        | <b>0.287</b> | 0.237        |
| clim19: Precipitation of Coldest Quarter    | -0.185        | -0.266        | 0.001        | 0.015        |

205

206

207

208 **Supplementary References**

- 209 1. Baker, J. *et al.* *Amphibian habitat management handbook*. Amphibian and Reptile  
210 Conservation, Bournemouth, vol. 39. (2011)
- 211 2. Beebee, T. J. C. & Griffiths, R. A. *Amphibians and reptiles: A Natural History of the*  
212 *British Herpetofauna*. The new naturalist, Collins, London, p. 45–56. (2000)
- 213 3. Frost, D. R. Amphibian species of the world: an online reference, version 5.4.  
214 American Museum of Natural  
215 History. <http://research.amnh.org/vz/herpetology/amphibia>. (2021)
- 216 4. Lips, K. R., Reeve, J. D., & Witters, L. R. Ecological traits predicting amphibian  
217 population declines in Central America. *Conserv. Biol.* **17**(4), 1078–1088. (2003).
- 218 5. Stevens, V. M. *et al.* A comparative analysis of dispersal syndromes in terrestrial and  
219 semi-terrestrial animals. *Ecol. Lett.* **17**, 1039–1052. (2014)
- 220 6. Trochet, A. *et al.* A database of life-history traits of European amphibians. *Biodiver.*  
221 *Data J.* **2**. (2014)
- 222 7. Denzinger, A. & Schnitzler, H. U. Bat guilds, a concept to classify the highly diverse  
223 foraging and echolocation behaviors of microchiropteran bats. *Front. Physiol.* **4**, 164.  
224 (2013)
- 225 8. Jung, K. & Threlfall, C. G. Trait-dependent tolerance of bats to urbanization: a global  
226 meta-analysis. *Proc Roy. Soc. B*, **285**(1885), p. 20181222. (2018)
- 227 9. Hinners, S. J., Kearns, C. A. & Wessman, C. A. Roles of scale, matrix, and native  
228 habitat in supporting a diverse suburban pollinator assemblage. *Ecolog. Applic.* **22**,  
229 1923–1935. (2012)
- 230 10. Normandin, E. *et al.* Taxonomic and functional trait diversity of wild bees in different  
231 urban settings. *PeerJ* **5**, e3051. (2017)
- 232 11. Threlfall, C. G. *et al.* The conservation value of urban green space habitats for  
233 Australian native bee communities. *Biolog. Conserv.* **187**, 240–248. (2015)
- 234 12. Cariveau, D. P. *et al.* The allometry of bee proboscis length and its uses in ecology.  
235 *PloS one*, **11**, e0151482. (2016)
- 236 13. Michener, C. D. *The bees of the world*. Johns Hopkins University Press, Baltimore.,  
237 MD. (2000)
- 238 14. Jetz, W., Sekercioglu, C.H. & Böhning-Gaese, K. The worldwide variation in avian  
239 clutch size across species and space. *PLoS biology*, **6**, e303. (2008)
- 240 15. Sheard, C. *et al.* Ecological drivers of global gradients in avian dispersal inferred from  
241 wing morphology. *Nat. Commun.* **11**, 2463. (2020)
- 242 16. Wilman, H. *et al.* EltonTraits 1.0: Species-level foraging attributes of the world's birds  
243 and mammals: Ecological Archives E095-178. *Ecology*, **95**, 2027. (2014)
- 244 17. Klaiber, J. *et al.* *Fauna Indicativa*. WSL Berichte 54 : 198 S. (2017)

- 245 18. Lindroth, C. H. *The Carabidae (Coleoptera) of Fennoscandia and Denmark*. Fauna  
246 Entomologica Scandinavica 15, part 1. Scandinavian Science Press Ltd, Copenhagen,  
247 Denmark. Brill Archive (1). (1985)
- 248 19. Lindroth, C. H. *The Carabidae (Coleoptera) of Fennoscandia and Denmark*. Fauna  
249 Entomologica Scandinavica 15, part 2. Scandinavian Science Press Ltd, Copenhagen,  
250 Denmark. Brill Archive (1). (1986)
